# Supplementary material for: Long non-coding RNA LCAL62 / LINC00261 is associated with lung adenocarcinoma prognosis
Source: PubMed Central journal article supplement — Heliyon. 2020 Mar 5;6(3):e03521. doi: 10.1016/j.heliyon.2020.e03521 (PMC7062942; doi:10.1016/j.heliyon.2020.e03521), 2020-03-05

Fig S1. Full non-adjusted images of western blots of A549 and HOP62 cell lines treated with StemXVivo from Fig. 2.

A549

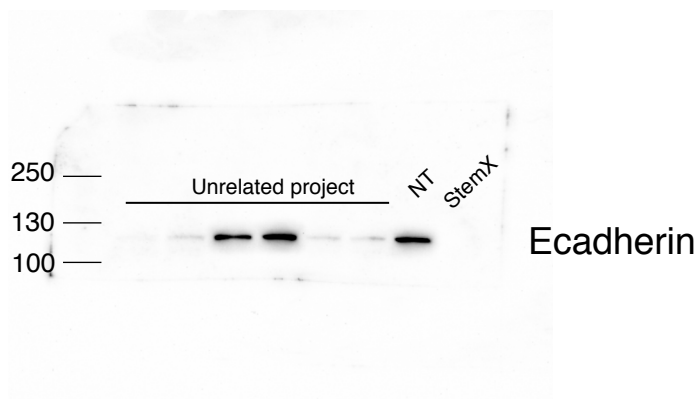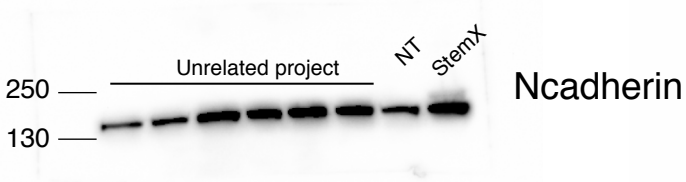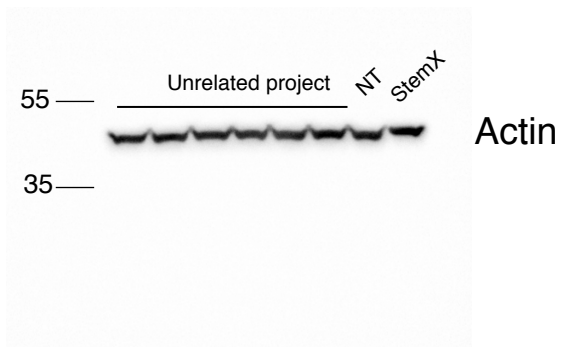

HOP62

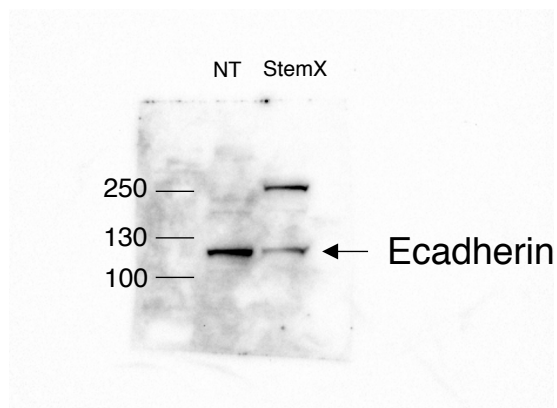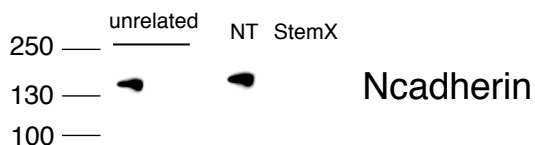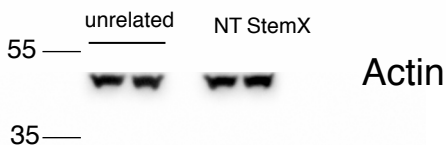

Supplement: mmc2.pdf [file mmc2.pdf]
